# Supplementary material
Source: MDPI journal article supplement (https://www.mdpi.com/2072-4292/13/11/2047)

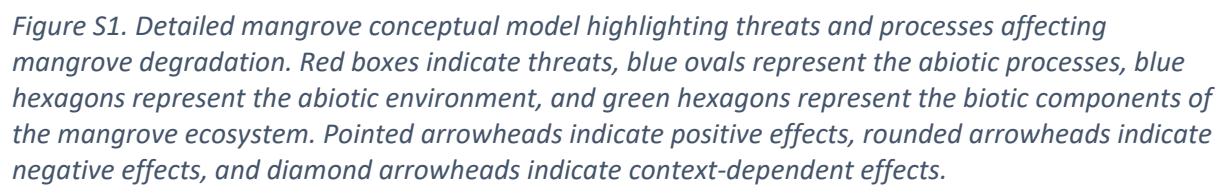

Supplement: s1 [file s1 › remotesensing-1185575-supplementary.pdf]
